# Supplementary material
Source: PubMed Central journal article supplement (PMC7076562)
Supplement: NIHMS1547901-supplement-1.pdf [file NIHMS1547901-supplement-1.pdf]

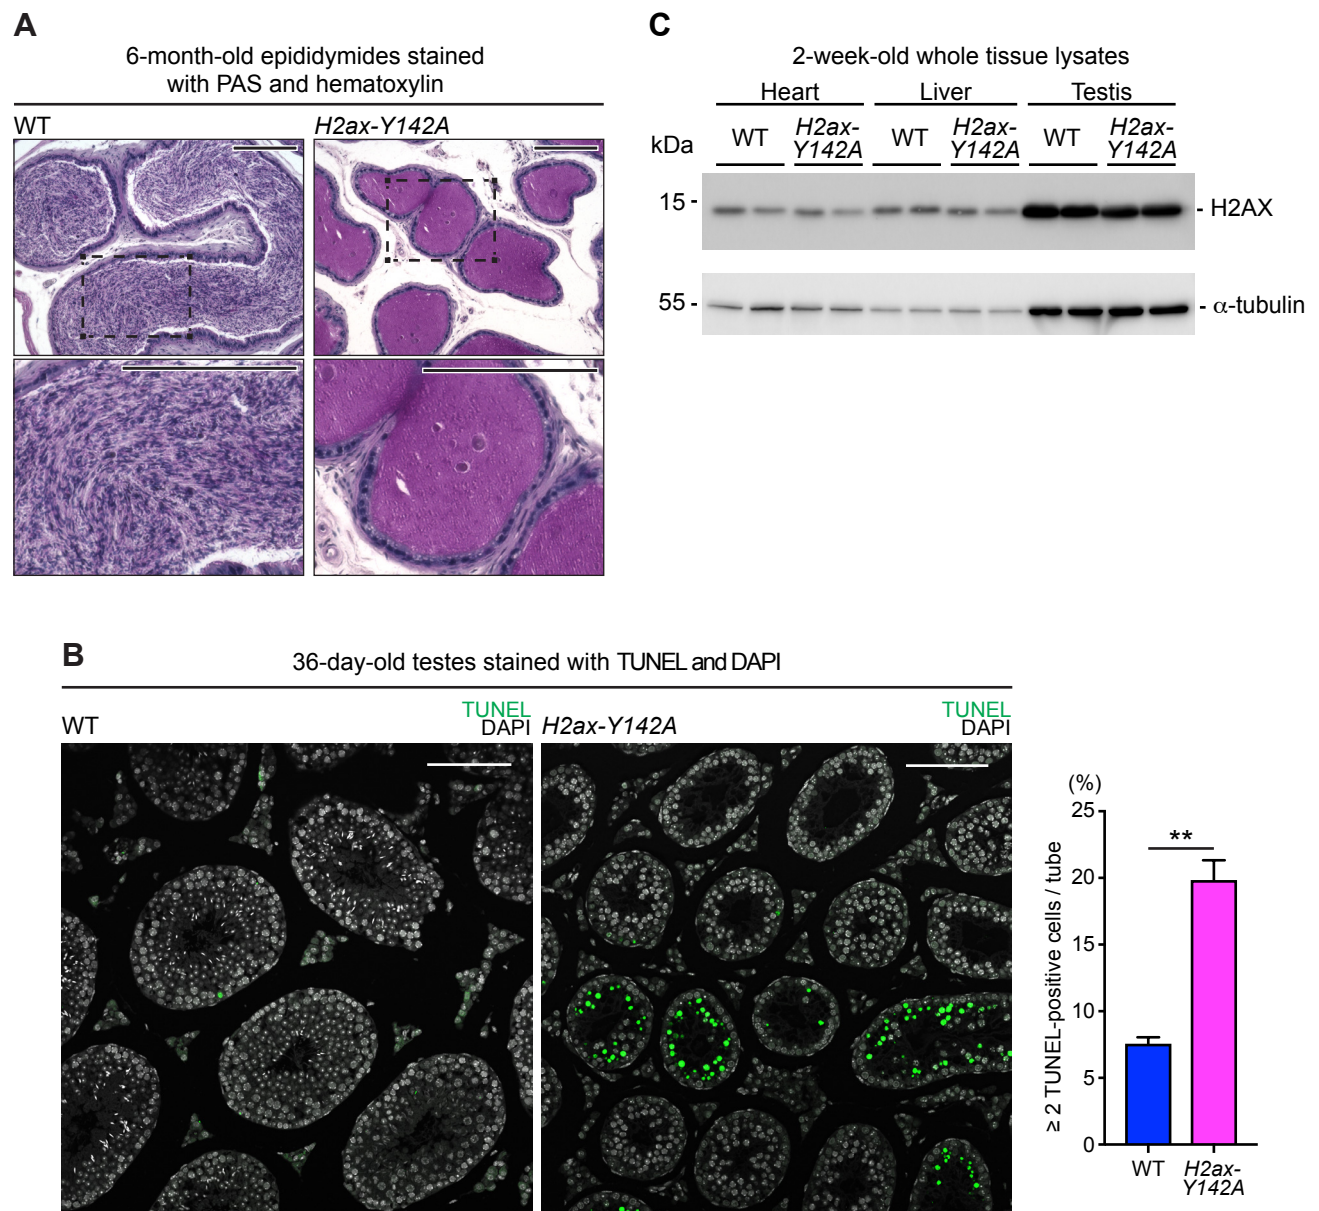

**Figure S1. Characterization of *H2ax-Y142A* mice, Related to Figure 1.**

(A) Epididymis sections from wild-type (WT) littermate control (left panels) and *H2ax-Y142A* (right panels) at 6 months of age subjected to periodic acid-Schiff (PAS) staining and hematoxylin counterstaining. Dashed squares are magnified in the bottom panels. Scale bars: 200  $\mu$ m.

(B) Testis sections of WT littermate control (left panel) and *H2ax-Y142A* (middle panel) at 36 days of age subjected to TUNEL staining and DAPI counterstaining. Percentage populations of seminiferous tubules with  $\geq 2$  TUNEL-positive cells shown as mean  $\pm$  s.e.m. for 3 independent littermate pairs (right panel). Total numbers of analyzed seminiferous tubules are indicated in the panel. \*\*  $p < 0.01$ , unpaired t test. Scale bars: 100  $\mu$ m.

(C) Western blotting of whole tissue lysates from mouse heart, liver, and testis of WT and *H2ax-Y142A* at 2 weeks of age with anti-H2AX antibody. 20- $\mu$ g protein samples were loaded in each lane. Two independent samples for WT and *H2ax-Y142A* are shown. Loading control:  $\alpha$ -tubulin.

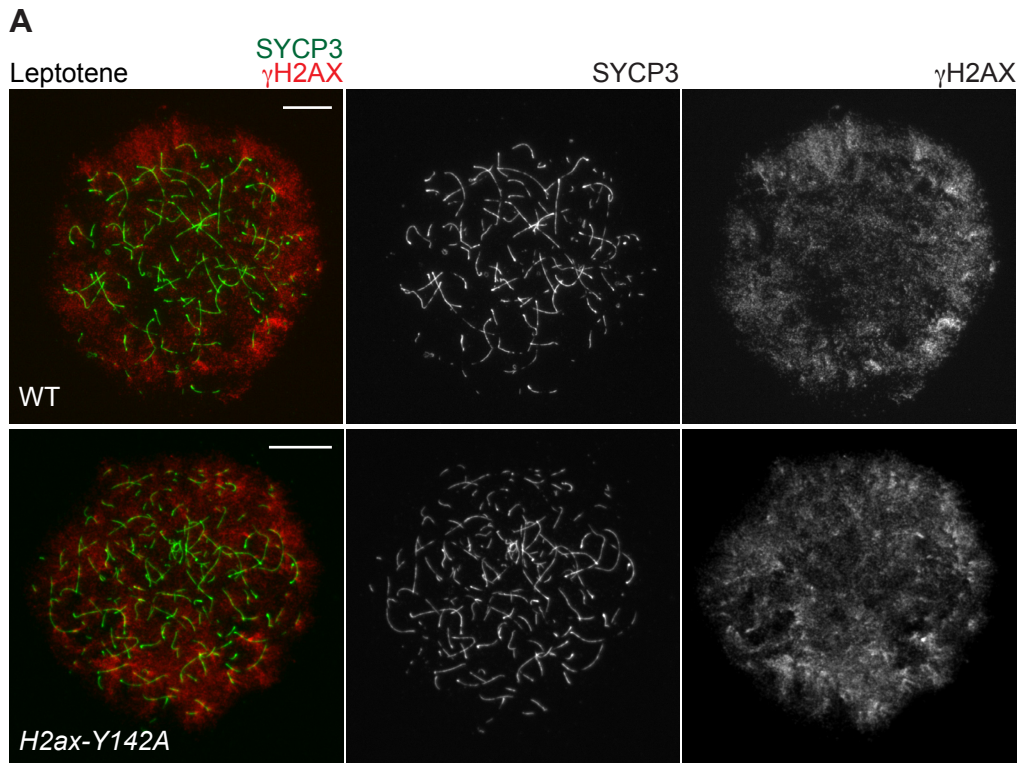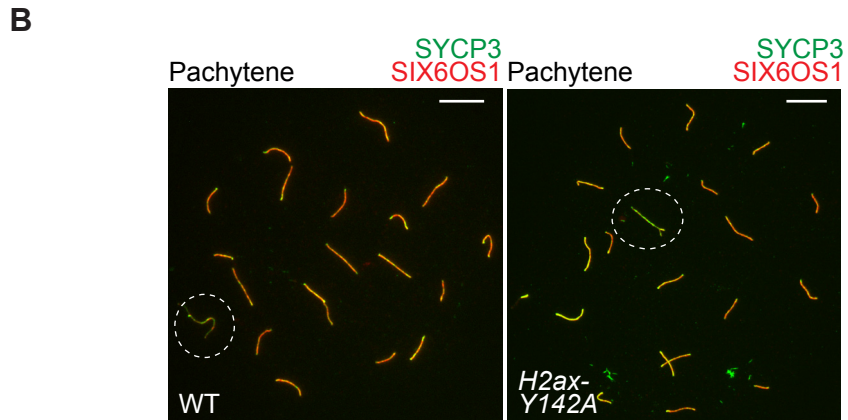

**Figure S2. Normal formation of nuclear-wide  $\gamma$ H2AX and autosomal synapsis in *H2ax-Y142A* mice, Related to Figure 2.**

(A) Chromosome spreads of wild-type (WT) littermate control and *H2ax-Y142A* leptotene spermatocytes immunostained with antibodies raised against SYCP3 and  $\gamma$ H2AX. Scale bars: 10  $\mu$ m.

(B) Chromosome spreads of WT littermate control and *H2ax-Y142A* pachytene spermatocytes immunostained with antibodies raised against SYCP3 and SIX6OS1. Dashed circles indicate the sex chromosomes. Scale bars: 10  $\mu$ m.

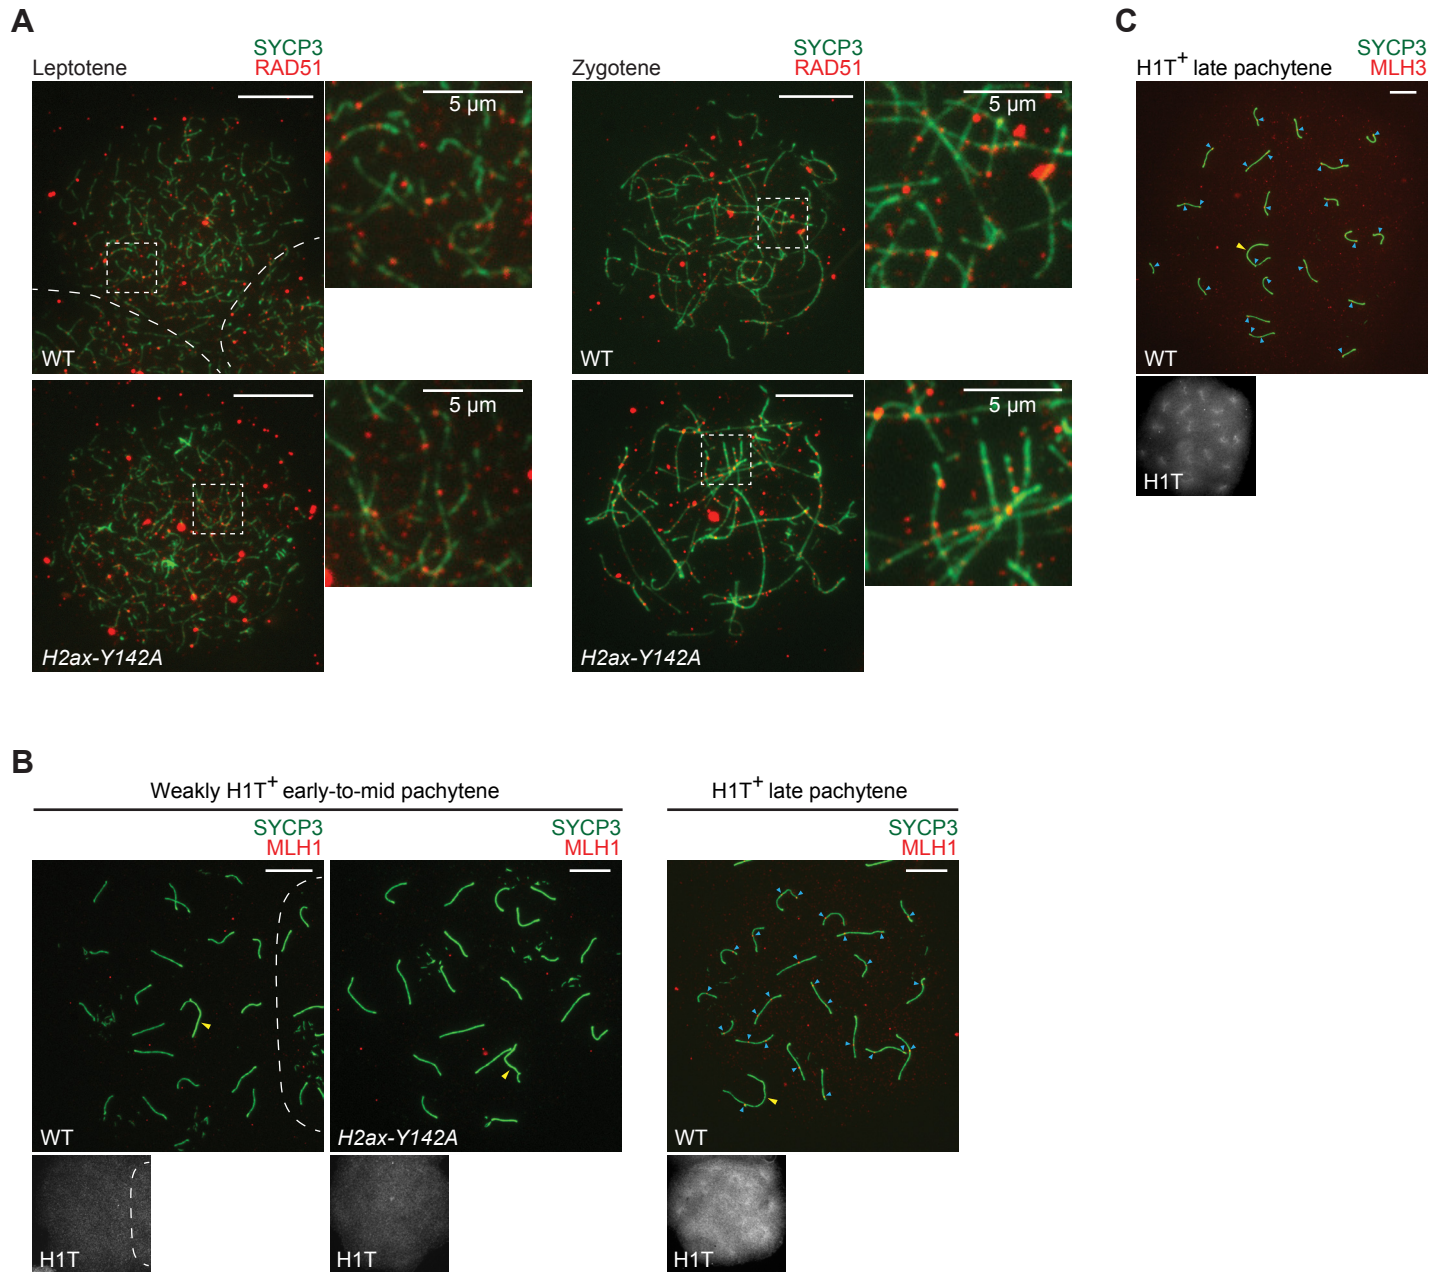

**Figure S3. Normal DSB-formation in *H2ax-Y142A* mice and timely accumulation of MLH1 and MLH3 at the late pachytene stage, Related to Figure 4.**

(A-C) Chromosome spreads of wild-type (WT) littermate control and *H2ax-Y142A* pachytene spermatocytes immunostained with antibodies raised against the following proteins: SYCP3 (A-C), RAD51 (A), MLH1 (B), MLH3 (C), and H1T (B, C). Dashed squares are magnified in the panels to the right. Yellow arrowheads indicate sex chromosomes (B, C) and blue arrowheads indicate MLH1 (B) or MLH3 (C) foci, which were recruited to all chromosomes, each chromosome bearing a minimum of 1 focus or maximum of 2 foci. Scale bars: 10  $\mu$ m unless otherwise described in the panels.



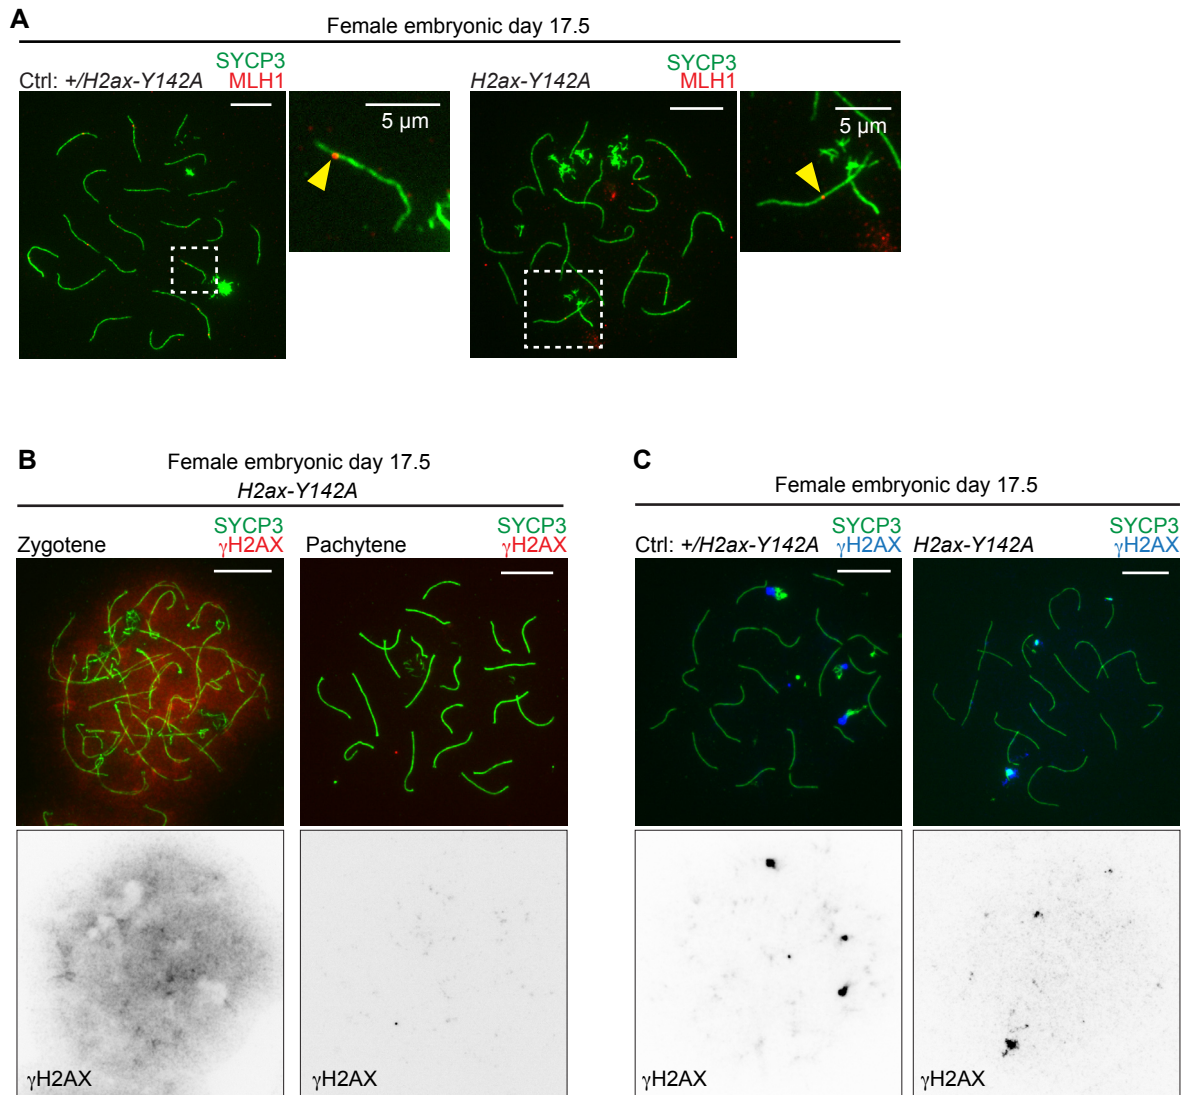

**Figure S4. Meiotic prophase I in *H2ax-Y142A* oocytes is normal, Related to Figure 4.**

(A–C) Chromosome spreads of heterozygote (Ctrl) littermate control and *H2ax-Y142A* oocytes at embryonic day 17.5 (i.e., in either the zygotene or pachytene stage) immunostained with antibodies raised against SYCP3 (A, B, C), MLH1 (A), and  $\gamma$ H2AX (B, C). Yellow arrowheads indicate MLH1 foci (A). Dashed squares are magnified in the panels to the right (A). Scale bars: 10  $\mu$ m.

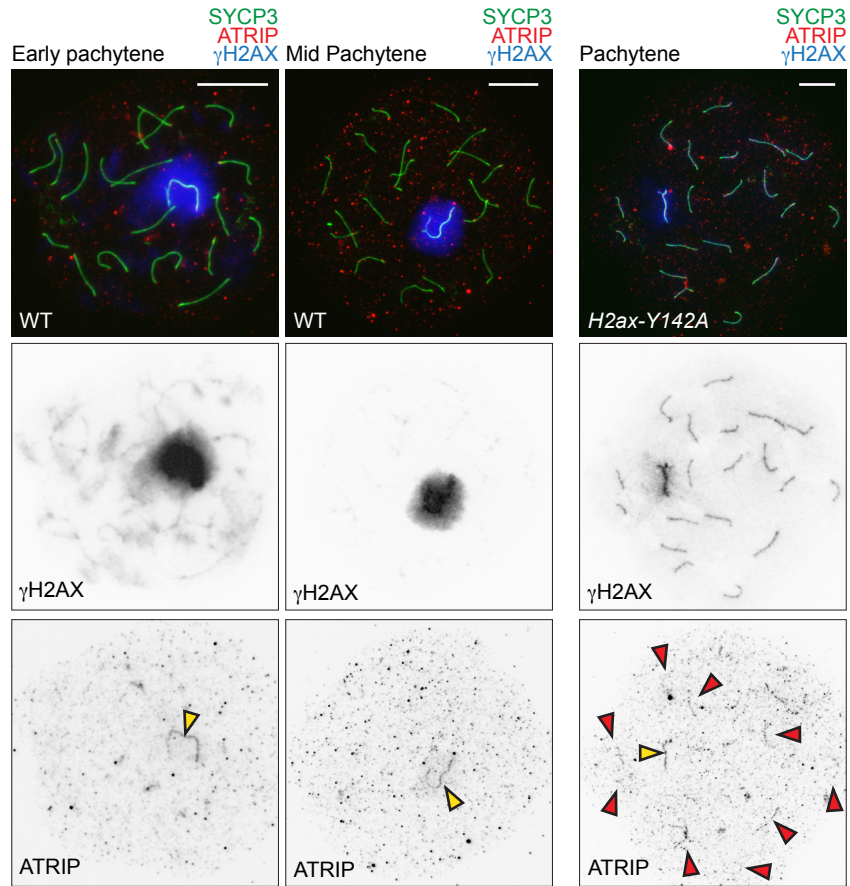

**Figure S5. ATRIP persists on the autosomes of *H2ax-Y142A* pachytene spermatocytes, Related to Figure 5.** Chromosome spreads of wild-type (WT) littermate control and *H2ax-Y142A* pachytene spermatocytes immunostained with antibodies raised against SYCP3,  $\gamma$ H2AX, and ATRIP. Yellow arrowheads indicate the sex chromosomes. Red arrowheads indicate ATRIP foci that persist on *H2ax-Y142A* autosomes. Scale bars: 10  $\mu$ m.

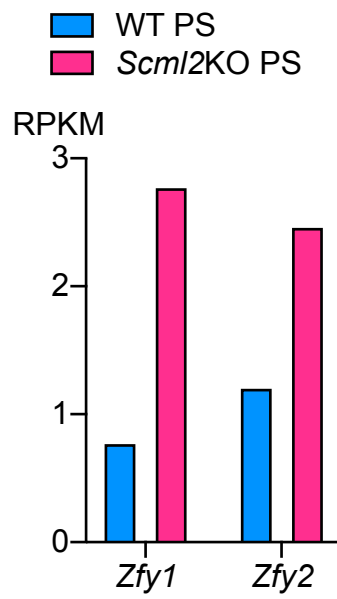

**Figure S6. Derepression of *Zfy1* and *Zfy2* genes in *Scml2*KO pachytene spermatocytes, Related to Figure 6.** RNA-seq RPKM values for the genes *Zfy1* and *Zfy2* in wild-type (WT) and *Scml2*KO pachytene spermatocytes.
